# Supplementary material
Source: publisher figshare collection journal article supplement (https://sage.figshare.com/ndownloader/files/22781882)
Supplement: Supplementary file 1 [file 22781882]

**Table 1.** Recommendations for intervention and research design to improve adherence to e-mental health

|                                                                                          |
|------------------------------------------------------------------------------------------|
| <i>Intervention Design</i>                                                               |
| Embed a terms and conditions section to which users agree                                |
| Outline expectations of program usage at the outset                                      |
| Include reminders with customisable scheduling                                           |
| Build a time-out function                                                                |
| Include interactive activities and non-compulsory activities                             |
| Embed engagement checks and provide feedback on responses                                |
| Include the user in the design process to aid in the understanding of user needs         |
| Consider whether Persuasive Design Features may be incorporated                          |
| <i>Research Design</i>                                                                   |
| Operationalise adherence from the outset and a justification for the adherence guideline |
| Include a measure of users' expectations and preferences                                 |
| Consider alternative study designs to the RCT that measure and model adherence factors   |
| Include ways to monitor non-compulsory activities and provide feedback                   |
